# Supplementary material for: Once a saint, now a sinner: An appropriate or inappropriate shock?
Source: PubMed Central journal article supplement (PMC11730734; doi:10.1002/joa3.13209), 2025-01-10

# Episode: VT-2 (210 min<sup>-1</sup> / 285 ms)

VT/VF Episode 3 of 3

Page 2 of 7

4 May 2024 10:00 am

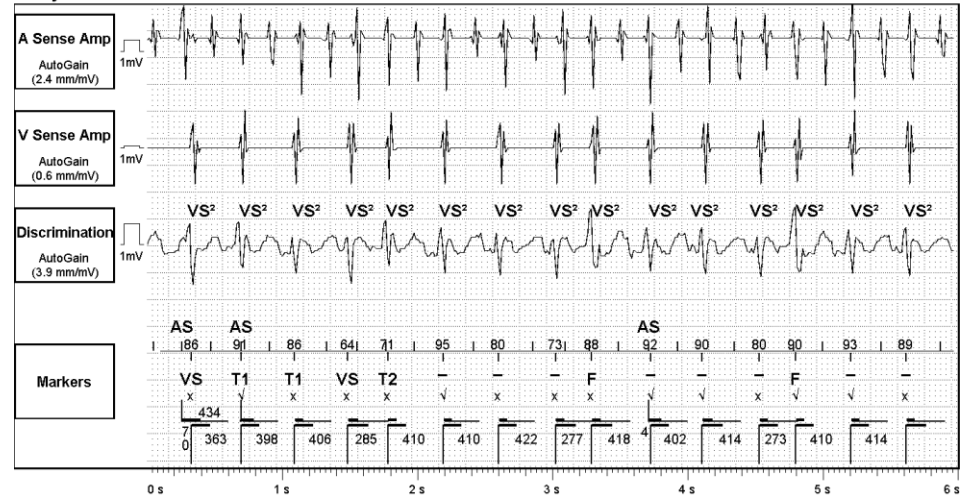

- 1: A Sense Amp AutoGain (2.4 mm/mV)
- 2: V Sense Amp AutoGain (0.6 mm/mV)
- 3: Discrimination AutoGain (3.9 mm/mV)

4: Markers

Sweep Speed: 25 mm/s

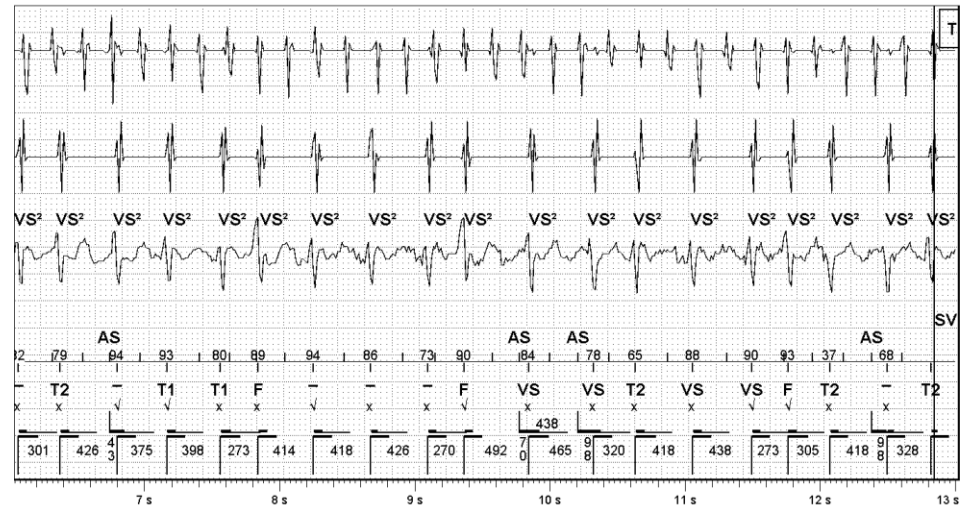

**Episode: VT-2 (210 min<sup>-1</sup> / 285 ms)** (Continued)

4 May 2024 10:00 am

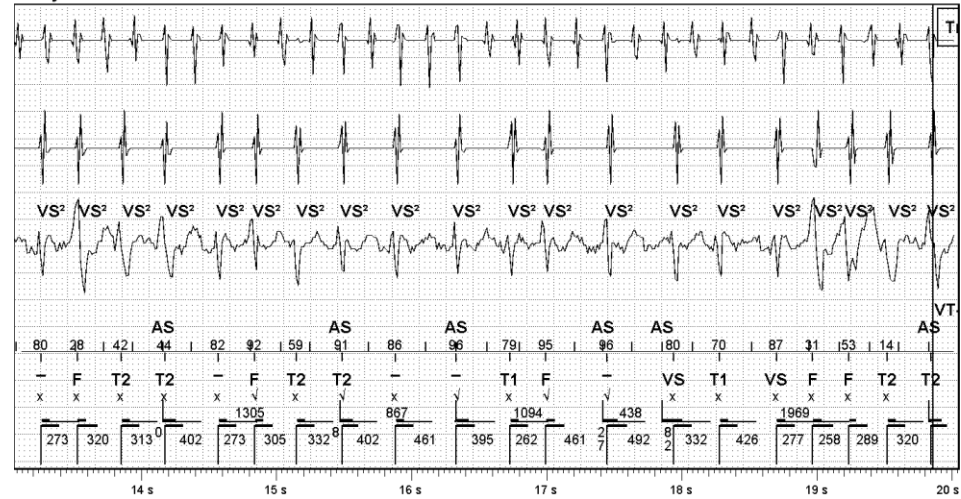

- 1: A Sense Amp AutoGain (2.4 mm/mV)
- 2: V Sense Amp AutoGain (0.6 mm/mV)
- 3: Discrimination AutoGain (3.9 mm/mV)

4: Markers

Sweep Speed: 25 mm/s

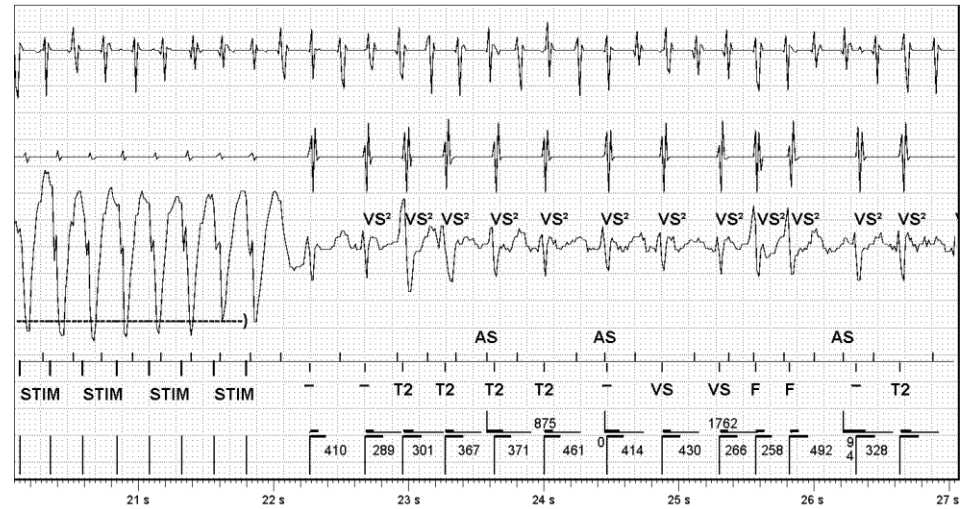

**Episode: VT-2 (210 min<sup>-1</sup> / 285 ms)** (Continued)

4 May 2024 10:00 am

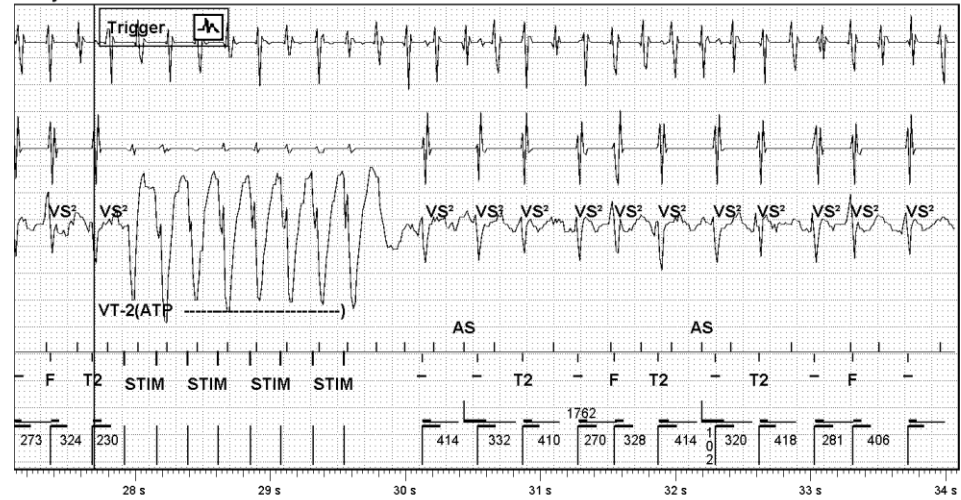

- 1: A Sense Amp AutoGain (2.4 mm/mV)
- 2: V Sense Amp AutoGain (0.6 mm/mV)
- 3: Discrimination AutoGain (3.9 mm/mV)

4: Markers

Sweep Speed: 25 mm/s

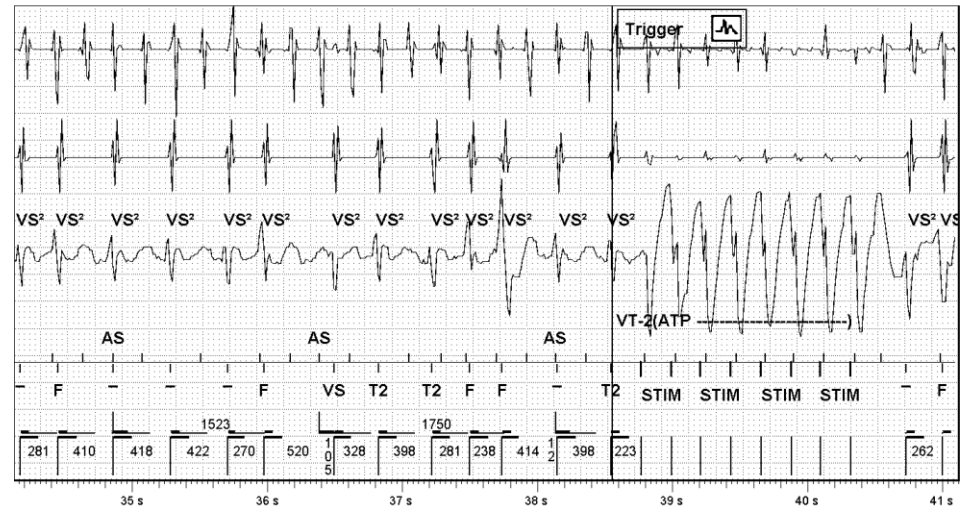

**Episode: VT-2 (210 min<sup>-1</sup> / 285 ms)** (Continued)

4 May 2024 10:00 am

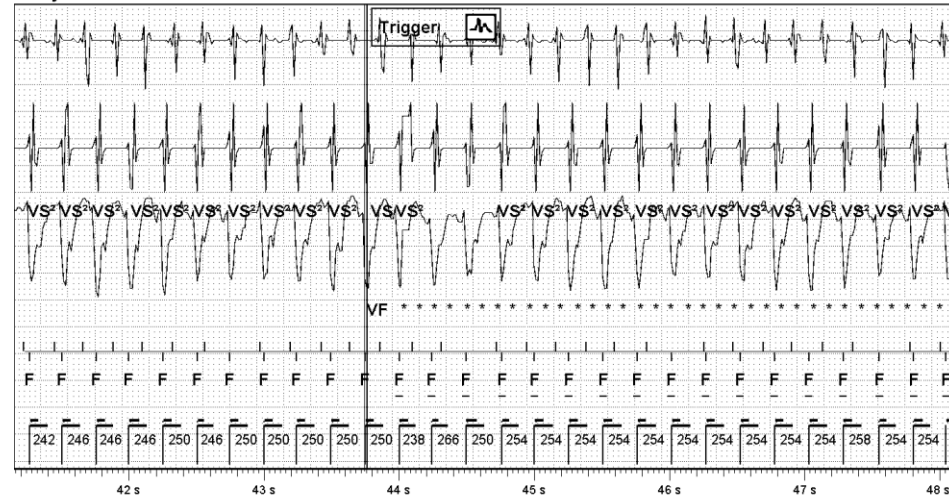

- 1: A Sense Amp AutoGain (2.7 mm/mV)
- 2: V Sense Amp AutoGain (0.7 mm/mV)
- 3: Discrimination AutoGain (2.2 mm/mV)

4: Markers

Sweep Speed: 25 mm/s

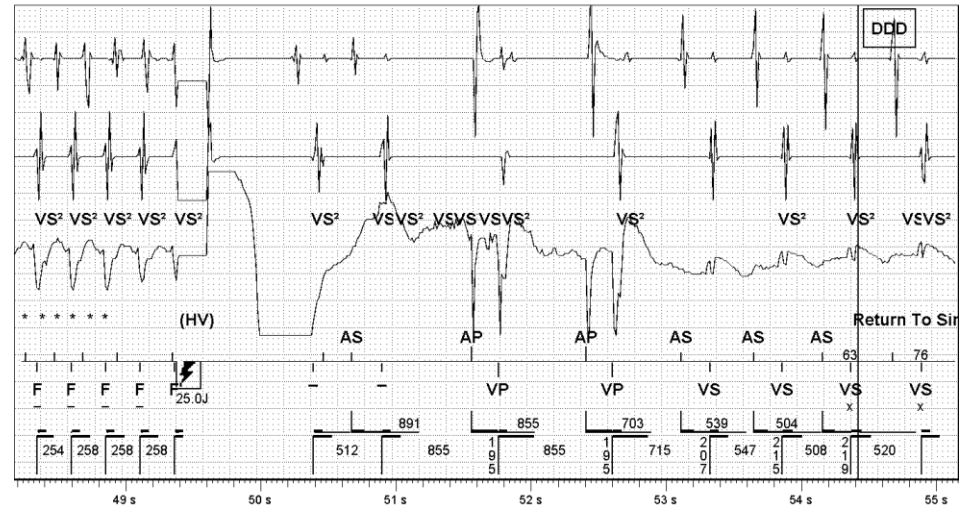

Supplement: JOA3-41-e13209-s001.pdf [file JOA3-41-e13209-s001.pdf]
